1 **Epithelial WNT2B and Desert Hedgehog are necessary for human colonoid regeneration**  
2 **after bacterial cytotoxin injury**

3 Julie G. In<sup>1,2\*</sup>, Jianyi Yin<sup>2</sup>, Michele Doucet<sup>2</sup>, Robert N. Cole<sup>3</sup>, Lauren DeVine<sup>3</sup>, Mark Donowitz<sup>2</sup>,  
4 Nicholas C. Zachos<sup>2</sup>, Sarah E. Blutt<sup>4</sup>, Mary K. Estes<sup>4,5</sup>, Olga Kovbasnjuk<sup>1,2\*</sup>

5  
6 <sup>1</sup>Department of Internal Medicine, Division of Gastroenterology and Hepatology, University of  
7 New Mexico, Albuquerque, NM 87131

8 <sup>2</sup>Department of Medicine, Division of Gastroenterology and Hepatology, Johns Hopkins  
9 University School of Medicine

10 <sup>3</sup>Department of Biological Chemistry, Mass Spectrometry and Proteomics Facility, Johns  
11 Hopkins University School of Medicine, Baltimore, MD 21205

12 <sup>4</sup>Department of Molecular Virology and Microbiology, Baylor College of Medicine

13 <sup>5</sup>Department of Medicine, Section of Gastroenterology and Hepatology, Baylor College of  
14 Medicine, Houston, TX 77030

15 \*Co-correspondence: [jgin@salud.unm.edu](mailto:jgin@salud.unm.edu), [okovbasnjuk@salud.unm.edu](mailto:okovbasnjuk@salud.unm.edu)

16

17

18 **Running title: WNT2B and DHH promote colonoid regeneration**

19

20 **SUMMARY**

21 Intestinal regeneration and crypt hyperplasia after radiation or pathogen injury relies on Wnt  
22 signaling to stimulate stem cell proliferation. Mesenchymal Wnts are essential for homeostasis  
23 and regeneration in mice, but the role of epithelial Wnts remains largely uncharacterized. Using  
24 the enterohemorrhagic *E. coli* secreted cytotoxin, EspP to induce injury to human colonoids, we  
25 evaluated a simplified, epithelial regeneration model that lacks mesenchymal Wnts. Here, we  
26 demonstrate that epithelial-produced WNT2B is upregulated following injury and essential for  
27 regeneration. Hedgehog signaling, specifically activation via the ligand Desert Hedgehog  
28 (DHH), but not Indian or Sonic Hedgehog, is another driver of regeneration and modulates  
29 WNT2B expression. These findings highlight the importance of epithelial WNT2B and DHH in  
30 regulating human colonic regeneration after injury.

31

32

## 33 INTRODUCTION

34 The adult intestine has the amazing capacity to regenerate following stress, inflammation, or injury  
35 (Beumer and Clevers, 2016); however, the mechanisms that regulate regeneration are not well  
36 understood. Much of our knowledge in intestinal stem cell renewal and regeneration stems from  
37 studies in *Drosophila* (Jiang et al., 2016) and mice (Farin et al., 2016; Metcalfe et al., 2014; Ritsma et  
38 al., 2014). Studies in mouse models have led to characterization of the active and reserve intestinal  
39 stem cells in homeostasis and injury. Particularly relevant are *Drosophila* studies that revealed the  
40 importance of Wnt and Hedgehog signaling in development, maintenance, and regeneration of the  
41 midgut. However, the interplay of these two signaling pathways is not limited to intestinal  
42 maintenance. Hedgehog and Wnt signaling are essential pathways in development, homeostasis,  
43 and regeneration of many organs. The common features that influence regeneration after injury  
44 in classical regeneration models are: Wnt, Hedgehog, and Notch (Franco et al., 2013). Hedgehog  
45 signaling is essential in skin wound healing (Le et al., 2008), cardiac (Wang et al., 2016a), gastric  
46 (Konstantinou et al., 2016), lung (Sriperumbudur et al., 2016), hematopoietic (Trowbridge et al.,  
47 2006), and liver regeneration (Langiewicz et al., 2016; Wang et al., 2016b), as well as epidermal  
48 stem cell homeostasis (Adolphe, 2004). Additionally, intestinal regeneration in *Drosophila* is  
49 stimulated by active Hedgehog signaling (Tian et al., 2015). *Sonic hedgehog (SHH)* is the most  
50 widely expressed mammalian Hedgehog ligand (Varjosalo and Taipale, 2008), but *Indian*  
51 *hedgehog (IHH)* has been shown to be highly expressed in human colon (Van den Brink, 2007;  
52 van den Brink et al., 2004). The presence and role, if any, of *Desert hedgehog (DHH)* has not  
53 been characterized in the colon, although *DHH* has been linked to maintenance and regeneration  
54 of the corneal epithelium (Kucerova et al., 2012).

55           Thus far, only three studies have detailed the importance of epithelial Wnts in  
56 homeostasis or response to injury in the intestine (O’Connell et al., 2018; Suh et al., 2017; Zou et  
57 al., 2018), with most studies focused on the role of mesenchymal Wnts in homeostasis and  
58 disease (Gregorieff et al., 2005; Greicius et al., 2018; Koch, 2017; Shoshkes-Carmel et al., 2018;  
59 Valenta et al., 2016). The majority of data gained on mouse intestinal injury models suggests that  
60 the mesenchymal Wnts are necessary for epithelial regeneration, but did not characterize the role  
61 epithelial Wnts may be playing in these processes.

62           Human colonoid cultures are a tractable, epithelial-only model that can indefinitely  
63 proliferate due to the presence of adult intestinal stem cells (Sato et al., 2011), making them an  
64 excellent model to study intestinal crypt injury and hyperplasia. Foodborne bacterial pathogens,  
65 such as enterohemorrhagic *E. coli* (EHEC) or *Citrobacter rodentium*, a mouse-adapted bacterium  
66 that affects the intestine similarly to EHEC, can cause severe damage to the intestinal epithelia,  
67 resulting in hyperproliferation and crypt hyperplasia post-infection (Khan et al., 2006; Vallance  
68 et al., 2003; Xicohtencatl-Cortes et al., 2007). We have previously characterized the EHEC-  
69 secreted serine protease cytotoxin, EspP, as an important virulence factor in EHEC infection and  
70 colonic epithelial damage (In et al., 2013). Cytotoxins in the family of serine protease  
71 autotransporters of *Enterobacteriaceae* (SPATEs) are secreted by most pathogenic *E. coli* and  
72 have well characterized functions that aid in bacterial adherence and colonization of epithelial  
73 cells (Dautin, 2010). Two SPATEs, Pet and EspC, secreted by enteroaggregative *E. coli* and  
74 enteropathogenic *E. coli*, respectively, cause cytotoxicity to intestinal explants (Henderson et al.,  
75 1999; Mellies et al., 2001). However, whether or not EspP has cytotoxic properties on intestinal  
76 cells has been controversial (Weiss and Brockmeyer, 2012).

77           In this study, we used the EHEC cytotoxin, EspP to induce epithelial injury and model  
78 the intestinal stem cell response that includes the initiation of regeneration using stem cell-  
79 derived human colonoids. Using both molecular and proteomics-based approaches, we found  
80 that epithelial-produced WNT2B and Desert Hedgehog-activated Hedgehog signaling interact  
81 and are necessary for human colonoid regeneration.

82

## 83 **RESULTS**

### 84 **EspP, a bacterial autotransporter, has a serine protease-dependent cytotoxic effect on** 85 **human colonoids**

86 To determine if EspP induces cytotoxicity in a serine protease-dependent manner in human  
87 colonoids, we added recombinant EspP or its serine protease-deficient mutant, EspP 263A (Khan  
88 et al., 2011), to normal human colonoids. After an overnight treatment with EspP (50 µg/ml), all  
89 human colonoid lines used in this study (Supplementary Table 1) exhibited cell shedding and  
90 loss of colonoid structure, indicators of cell death (Figure 1). In contrast, overnight treatment  
91 with the protease-deficient mutant, EspP S263A (50 µg/ml), had no visible detrimental effect on  
92 the colonoids. Therefore, EspP has a cytotoxic effect on human colonoids and this activity is  
93 serine protease-dependent.

94           We hypothesized that EspP-induced injury would model the EHEC-induced denuded  
95 colonic epithelia and crypt hyperplasia, the latter mimicked by colonoid regeneration after EspP-  
96 induced injury. To test this hypothesis, control and EspP-injured colonoids were harvested after  
97 overnight EspP treatment and replated to monitor for colonoid regeneration. The formation of  
98 colonoids in the EspP-treated cultures was observed at 24h and 48h post-replating (Figure 2A).  
99 At 24h, the colonoids were generally smaller in size compared to control and primarily

100 spheroids. In contrast, at 48h, the regenerating colonoids more resembled the control culture,  
101 with colonoids beginning to form multi-lobular structures (Figure 2B). Therefore, human  
102 colonoids can regenerate after injury by the bacterial cytotoxin EspP.

103 **Proteomics analysis shows WNT2B and Desert Hedgehog are upregulated during**  
104 **regeneration**

105 To begin to identify key regeneration-associated pathways, we employed a proteomics  
106 approach. Control, EspP- and EspP S263A-treated colonoids were harvested, lysed, and the  
107 proteins were identified and quantified with tandem mass spectrometry and iTRAQ. Over 5000  
108 proteins in the EspP-treated culture were found up- or down-regulated compared to the control  
109 culture, with very little overlap of differentially expressed proteins between the EspP- and EspP  
110 S263A-treated cultures (Figure S1A). The majority of proteins identified in the proteomics assay  
111 were cytosolic or nuclear (Figure S1B). A key group of proteins that was upregulated in the EspP  
112 treated cultures were those associated with Wnt, Hedgehog, and putative stem cell-related  
113 proteins. An abbreviated list of these proteins is shown in Table 1. WNT2B isoform 3, WNT3A,  
114 Wntless and numerous downstream targets of GLI1 (active hedgehog signaling) were  
115 upregulated in the EspP-injured culture. Many of the proteins listed in Table 1 were either not  
116 changed or downregulated in the EspP S263A-treated (no cytotoxicity) culture suggesting that  
117 EspP specifically induced activation of Wnt and Hedgehog signaling as part of the colonic  
118 damage and regenerative response.

119 To assess WNT2B expression in the colonoids post-EspP injury, we performed  
120 immunostaining. WNT2B expression was concentrated in specific, rare epithelial cells in normal  
121 human colon crypt (Figure S2A) and in colonoids (Figure S2B). Not every colonic crypt or every  
122 colonoid had WNT2B-positive cells. However, colonoids regenerating 24h after EspP-induced

123 injury contained more WNT2B+ cells and diffuse WNT2B staining throughout the colonoid  
124 (Figure S2C and C’).

125 We performed qRT-PCR to validate the key pathway molecules identified in the  
126 proteomics screen. The mRNA expression of select stem cell, Wnt, and Hedgehog genes was  
127 compared between EspP-injured regenerating (at the 24h timepoint) and control colonoids.  
128 Although the injured colonoids regenerate to re-form their 3D structure after EspP washout, the  
129 intestinal stem cell markers *LGR4* and *LGR5* were not upregulated. *LGR4* was significantly  
130 downregulated, whereas *LGR5* was unchanged (Figure 3). *BMII*, which was significantly  
131 upregulated in the proteomics result, showed an upward trend in its mRNA expression, but  
132 without reaching statistical significance. The proteomics screen identified WNT2B isoform 3 as  
133 significantly upregulated in the EspP-injured regenerating colonoids. The EspP-injured  
134 regenerating colonoids had a slight downregulation of *WNT2B2* (previously known as *WNT13A*),  
135 an upward trend of *WNT2B1* (*WNT13B*), and a significant upregulation of *WNT2B3* (*WNT13C*)  
136 (Figure 3). WNT2B3’s upregulation following EspP-induced injury confirmed the proteomics  
137 assay, but was still unexpected as it is not thought to be a classical epithelial-produced Wnt.

138 Since numerous downstream targets of Hedgehog signaling were upregulated in the  
139 regenerating colonoids, we evaluated whether the canonical Hedgehog effectors *GLI1* and *GLI2*  
140 were changed in the regenerating colonoids. Both genes have been found upregulated in colon  
141 cancer cell lines (Mazumdar et al., 2011; Zhang et al., 2017) and implicated in cancer cell  
142 proliferation. *GLI2* transcripts were not detected in either the control or regenerating colonoids.  
143 However, *GLI1* was significantly upregulated in the regenerating colonoids (Figure 3). Only the  
144 hedgehog ligand *DHH* was significantly upregulated in the regenerating colonoids (Figure 3).  
145 Both hedgehog ligands *SHH* and *IHH* were significantly downregulated. Overall, the EspP-

146 injured regenerating colonoids lead to upregulation of hedgehog signaling, specifically via the  
147 hedgehog ligand, DHH.

### 148 **Epithelial Wnt is indispensable for colonoid regeneration**

149 To determine whether epithelial produced Wnts are important for colonoid regeneration,  
150 control and EspP-injured colonoids were monitored in the absence (Figure 4A) or presence  
151 (Figure 4B) of IWP-2 (2.5  $\mu$ M), a porcupine inhibitor that inhibits palmitoylation of all Wnts and  
152 results in inhibition of processing and secretion of Wnts (Farin et al., 2012). The colonoid media  
153 containing 50% v/v Wnt3A conditioned media was maintained in all experimental conditions. As  
154 previously shown, the EspP-injured colonoids were able to regenerate and re-form 3D colonoids  
155 after EspP is removed (Figure 4A). In the continued presence of IWP-2 (pre-treatment prior to  
156 EspP addition, during EspP treatment, and during the 24h regeneration period), EspP-injured  
157 colonoids were unable to re-form 3D colonoids. Interestingly, the control culture showed no  
158 morphologic difference in the presence of IWP-2 (Figure 4B). This suggests that the Wnt3A  
159 conditioned media is sufficient to maintain homeostatic growth and proliferation of colonoids,  
160 but is not sufficient for regeneration following EspP-induced injury. Inhibition of epithelial Wnt  
161 secretion (by IWP-2) prevents human colonoid regeneration. This indicates that epithelial Wnt(s)  
162 are necessary for regeneration.

163 The proteomics screen identified upregulation of WNT2B3 in the EspP-injured colonoids.  
164 We evaluated if WNT2B alone could stimulate regeneration. Recombinant human WNT2B  
165 (rhWNT2B) was added to colonoids at the same time as IWP-2 and kept in the cultures during  
166 the course of the experiment. Although IWP-2 inhibited colonoid regeneration, rhWNT2B was  
167 sufficient to rescue and promote regeneration after EspP-induced injury (Figure 4C). To  
168 determine the direct effect of epithelial WNT2B on colonoid regeneration post EspP-injury, we

169 used a lentiviral shRNA approach to knockdown *WNT2B* in the colonoids. As a technical  
170 control, we used a lentiviral shRNA to knockdown *DRA* (*SLC26A3*) in human duodenal  
171 enteroids. At 17 days post-transduction (15 days after the start of puromycin selection), the  
172 enteroids with *DRA* shRNA were thriving in the presence of puromycin (Figure S3). In contrast,  
173 the colonoids with *WNT2B* shRNA sharply declined and were unable to propagate (Figure S3).  
174 This result is consistent with the report by O'Connell et al., 2018 in which the enteroids and  
175 colonoids derived from *WNT2B*-deficient individuals were not stable and could only form a  
176 short-term culture in the presence of recombinant murine *WNT2B*.

177 Studies in chick retinal explants found that *Wnt2b* overexpression leads to increased cell  
178 proliferation and the growth of large, folded retinal tissue (Ohta et al., 2011). However, co-  
179 overexpression of *Wnt2b* with the small, leucine-rich proteoglycan Tsukushi (*Tsk*) led to an  
180 inhibition of the *Wnt2b*-dependent hyperproliferation. Since we could not create a viable *WNT2B*  
181 KD human colonoid line, we examined whether *TSK* could inhibit *WNT2B* function in  
182 colonoids. Colonoids were treated with recombinant human *TSK* (rh*TSK*). Similar to the  
183 presence of *IWP-2*, control colonoids showed no morphologic difference in the presence of  
184 rh*TSK* (Figure 5). However, the *EspP*-injured colonoids were unable to regenerate in the  
185 presence of rh*TSK*. Taken together, these data indicate that epithelial *WNT2B* is necessary for  
186 colonoid regeneration after *EspP*-induced injury.

### 187 ***DHH* activated hedgehog signaling modulates *WNT2B***

188 The regenerating colonoids also had a significant upregulation of *DHH* and *GLII* (Figure  
189 3) suggesting an active role for hedgehog signaling following *EspP*-induced injury. To determine  
190 whether there was a link between Hedgehog signaling and *WNT2B* in regeneration, we treated  
191 colonoids with either the Smoothened agonist (*SAG*) or recombinant human *DHH* (rh*DHH*)



192 prior to EspP exposure. SAG binds to Smoothed and induces activation of the Hedgehog  
193 pathway (Chen et al., 2002). Its function is thought to be Hedgehog ligand-independent. DHH, as  
194 a Hedgehog ligand, also activates the Hedgehog pathway. Colonoids present 24h after  
195 regeneration were collected and analyzed for gene expression of stem cell markers, WNT, and  
196 Hedgehog pathway molecules. mRNA expression in the presence of the agonists was compared to  
197 control (no agonists). The intestinal stem cell markers *LGR4* and *LGR5* were further  
198 downregulated in the presence of SAG compared to control. However, both genes were  
199 upregulated in the presence of rhDHH compared to control (Figure 6). *BMI1* remained largely  
200 unchanged with SAG treatment, but was significantly upregulated in the EspP-injured, rhDHH  
201 treated colonoids, similar to the upregulation of *LGR4* and *LGR5*. This suggests that DHH  
202 activates a specific Hedgehog pathway that SAG does not. DHH-activated signaling has a direct  
203 effect on the intestinal stem cell markers.

204 SAG treatment significantly downregulated *WNT2B1* and *WNT2B2* in EspP-injured  
205 colonoids. In contrast, *WNT2B3* expression continued to trend upwards. rhDHH treatment had no  
206 effect on *WNT2B1* and *WNT2B2* expression in EspP-injured colonoids. However, *WNT2B3* was  
207 significantly upregulated (Figure 6). This suggests that DHH positively modulates *WNT2B3*  
208 expression during colonoid regeneration. Similar to the stem cell markers that we evaluated,  
209 SAG and rhDHH caused different expression patterns of the three *WNT2B* isoforms.

210 SAG treatment either significantly downregulated or had no effect on expression of *SHH*  
211 and *IHH* in both control and EspP-injured colonoids, but significantly upregulated *DHH* and  
212 *GLII* expression in EspP-injured colonoids. EspP-injured colonoids showed significant  
213 upregulation of *GLII* and *DHH* in the presence of rhDHH, compared to control (Figure 6).  
214 These data show that both SAG (hedgehog activation) and rhDHH can modulate *WNT2B*

215 expression, but only *WNT2B3* is upregulated in EspP-injured colonoids with these hedgehog  
216 agonists. DHH acts in a specific manner to activate hedgehog signaling following injury to the  
217 colonoids. Although SAG and rhDHH treatment similarly upregulated *DHH* and *GLII* in EspP-  
218 injured colonoids, they had different effects on the expression levels of the other genes  
219 interrogated. This suggests that DHH activates Hedgehog signaling in a SAG-independent  
220 manner. Overall, these results show that human colonoids regenerate after bacterial cytotoxin-  
221 induced injury via interaction of the DHH and WNT2B-dependent pathways.

222

## 223 **DISCUSSION**

224 Intestinal regeneration is dependent on Wnt signaling to stimulate stem cell proliferation. Most  
225 studies have focused on the identity of the intestinal stem cells that drive proliferation and crypt  
226 hyperplasia in mouse models under both normal and post-injury conditions, particularly post-  
227 radiation (Hua et al., 2012; Hua et al., 2017; Kuruvilla et al., 2016; Metcalfe et al., 2014; Zhou et  
228 al., 2013). The regenerative pathways and key players in these pathways are not well understood.  
229 In this study, we focused on characterizing the molecules that drive a regenerative response  
230 following exposure to a virulence factor in a bacterial diarrheal disease: EspP, an EHEC-secreted  
231 bacterial cytotoxin that causes epithelial damage. Colonic regeneration is dependent on epithelial  
232 signals, namely WNT2B and DHH. These two molecules activate Wnt and Hedgehog signaling  
233 interaction during colonic regeneration.

234 Using the human colonoid model, which contains no mesenchyme, we employed a  
235 proteomics screen to characterize the pathways that are active following EspP-induced injury.  
236 WNT2B and numerous proteins downstream of active Hedgehog signaling were upregulated,  
237 suggesting Wnt and Hedgehog signaling are important in colonoid regeneration. Both pathways

238 have been implicated in organ development and maintenance (Clevers, 2006; Petrova and  
239 Joyner, 2014), with Hedgehog signaling described as important in regeneration of most organs  
240 (Adolphe, 2004; Konstantinou et al., 2016; Langiewicz et al., 2016; Le et al., 2008;  
241 Sriperumbudur et al., 2016; Trowbridge et al., 2006; Wang et al., 2016a; Wang et al., 2016b).  
242 Although recent studies have focused on the crosstalk between Wnt and Hedgehog signaling in  
243 cancer progression (Jiang et al., 2014; Regan et al., 2017; Song et al., 2015), these two pathways  
244 also have been implicated in regeneration of bladder epithelia, bone, and adrenal glands (Day  
245 and Yang, 2008; Finco et al., 2018; Shin et al., 2011).

246 Our results indicate that epithelia-produced WNT2B and DHH are important regulators  
247 of human colonoid regeneration, with DHH modulating *WNT2B3* expression following EspP-  
248 induced injury. Activation of this particular Hedgehog pathway is not redundant between the  
249 three mammalian Hedgehog ligands. Sonic and Indian Hedgehog transcripts were either  
250 downregulated or unchanged during regeneration. Most of our understanding of Hedgehog  
251 signaling focuses on Sonic Hedgehog, likely because it is the most widely expressed mammalian  
252 Hedgehog ligand (Varjosalo and Taipale, 2008). The implications of downregulated *SHH* in  
253 colonoid regeneration are not clear, however, previous studies have shown that *IHH*  
254 downregulation initiates intestinal wound healing and abrogates adenoma development (Büller et  
255 al., 2015; van Dop et al., 2010). Until now, DHH function has not been well understood. It is  
256 primarily described as an essential factor in gonad (O'Hara et al., 2011; Rothacker et al., 2018;  
257 Yao et al., 2002) or peripheral nerve development (Bajestan et al., 2006; Parmantier et al., 1999).  
258 However, one study demonstrated an essential role for DHH in corneal homeostasis and  
259 regeneration (Kucerova et al., 2012). Our results highlight a novel role for DHH-activated  
260 Hedgehog signaling in human colonic regeneration.

261           In human colonoids and colonic tissue, WNT2B is localized to a rare cell that is not  
262 present in every colonoid or crypt. The identity of this cell in human colonoids is currently  
263 unknown but under further investigation. Regeneration following cytotoxin-induced injury  
264 results in diffuse WNT2B staining with a higher number of WNT2B+ cells, similar to a study  
265 that showed upregulation of *Wnt2b* in mouse intestinal crypts post-irradiation (Suh et al., 2017).  
266 This correlates with the upregulation of *WNT2B3* mRNA in the regenerating colonoids.  
267 Although WNT2B has been characterized as having two isoforms in cancer cells (Kato, 2001),  
268 three WNT2B isoforms have been identified in multiple mammalian cells and been shown to  
269 function disparately from each other (Bunaciu et al., 2008). Since our proteomics screen  
270 identified the WNT2B isoform 3, we used the primers described by Bunaciu et al. to distinguish  
271 between the WNT2B isoforms. The three isoforms were regulated differently during  
272 regeneration and in the presence of Hedgehog agonists, SAG and rhDHH.

273           Mesenchymal Wnts are clearly essential for regeneration (Gregorieff et al., 2005;  
274 Greicius et al., 2018; Koch, 2017; Shoshkes-Carmel et al., 2018; Valenta et al., 2016), but only a  
275 few studies have highlighted the importance of epithelial Wnts in intestinal development and  
276 injury response (O'Connell et al., 2018; Suh et al., 2017; Zou et al., 2018). Of note, recently  
277 *WNT2B* mutations were found to cause neonatal-onset chronic diarrhea, with inflammation seen  
278 in the stomach, duodenum, and colon (O'Connell et al., 2018). This study showed that enteroids  
279 from these *WNT2B*-deficient patients could not form stable cultures, although addition of  
280 recombinant murine *Wnt2b* stabilized the cultures for a short period. This study emphasizes the  
281 significant differences between the regeneration potential of mouse and human intestinal  
282 epithelium. Knockout or knockdown of *Wnt2b* in the whole mouse or mouse organoids,  
283 respectively, results in no detrimental phenotype. However, human intestinal epithelial WNT2B

284 is indispensable in intestinal development and regeneration following injury. Taken together,  
285 our studies indicate that data gained on mouse models of intestinal development, homeostasis,  
286 and injury may not directly translate to human intestinal physiology and pathophysiology.

287 In summary, using the bacterial cytotoxin EspP to model damage, we showed that human  
288 colonoids can be used to study the role of epithelial molecules in regeneration. Epithelial  
289 WNT2B and Desert Hedgehog are essential and interact during regeneration following injury.  
290 Importantly, the hedgehog ligands, Desert, Indian, and Sonic, are not redundant in colonic  
291 regeneration. Understanding the mechanisms that specifically drive WNT2B3 and DHH in  
292 colonic development and regeneration may provide the basis for useful therapeutics in controlled  
293 regeneration in patients with some colonic diseases.

294

295

296

297

298

299

300

301

302

303

304

305

306

307 **EXPERIMENTAL PROCEDURES**

308 **Tissue collection and colonoid generation.** Colonic biopsies from healthy individuals were  
309 obtained under Johns Hopkins University School of Medicine Institutional Review Board (IRB#  
310 NA\_00038329) and are detailed in Supplementary Table 1. Colonic crypt isolation and colonoid  
311 generation were prepared as previously reported (In et al., 2016; Jung et al., 2011). Briefly,  
312 biopsy tissue was minced, washed several times in freshly prepared cold chelating solution  
313 (CCS; 5.6mM Na<sub>2</sub>HPO<sub>4</sub>, 8mM KH<sub>2</sub>PO<sub>4</sub>, 96.2mM NaCl, 1.6mM KCl, 43.4mM sucrose,  
314 54.9mM D-sorbitol, and 0.5mM DL-dithiothreitol) and incubated 1 hour at 4°C in 10 mM EDTA  
315 in CCS on an orbital shaker. Isolated crypts were resuspended in Matrigel (Corning, Tewksbury,  
316 MA) and 30 ul droplets were plated in a 24-well plate (Corning). After polymerization at 37°C,  
317 500 ul of expansion media (EM) was added for 2 days (Advanced Dulbecco's modified Eagle  
318 medium/Ham's F-12 (ThermoFisher, Waltham, MA), 100 U/mL penicillin/streptomycin (Quality  
319 Biological, Gaithersburg, MD), 10 mM HEPES (ThermoFisher), and 1X GlutaMAX  
320 (ThermoFisher), with 50% v/v WNT3A conditioned medium (ATCC CRL-2647), 15% v/v R-  
321 spondin1 conditioned medium (cell line kindly provided by Calvin Kuo, Stanford University),  
322 10% v/v Noggin conditioned medium (cell line kindly provided by Gijs van den Brink, Tytgat  
323 Institute for Liver and Intestinal Research), 1X B27 supplement (ThermoFisher), 1mM N-  
324 acetylcysteine (MilliporeSigma), 50 ng/mL human epidermal growth factor (ThermoFisher), 10  
325 nM [Leu-15] gastrin (AnaSpec, Fremont, CA), 500 nM A83-01 (Tocris, Bristol, United  
326 Kingdom), 10 μM SB202190 (MilliporeSigma), 100 mg/mL primocin (InvivoGen, San Diego,  
327 CA), 10 μM CHIR99021 (Tocris), and 10 μM Y-27632 (Tocris)). After 2 days, the EM (without  
328 CHIR99021 and Y-27632) was replaced every other day. Colonoids were passaged every 7 days  
329 by harvesting in Cultrex Organoid Harvesting Solution (Trevigen, Gaithersburg, MD) at 4°C

330 with shaking for 30'. Colonoids were fragmented by trituration with a P200 pipet 30-50 times,  
331 collected and diluted in Advanced DMEM/F12, centrifuged at 300 xg for 10' at 4°C. The pellet  
332 was resuspended in Matrigel and plated as described for crypt isolation. All colonoid cultures  
333 were maintained at 37°C and 5% CO<sub>2</sub>. Unless noted, colonoid lines have been passaged >20  
334 times.

335

336 **Recombinant EspP generation and collection.** AD202 cells transformed with the plasmid  
337 encoding wild-type EspP (pRLS5) and serine protease-deficient mutant EspP S263A was kindly  
338 provided by H. Bernstein, NIH (Szabady et al., 2004). The cells were grown at 37°C in Luria-  
339 Bertani (LB) broth (ThermoFisher), overnight. They were then pelleted, washed, and grown at  
340 37°C in fresh LB broth for approximately 15'. IPTG (100 µM) was added to induce *espP* or *espP*  
341 *S263A* expression. The culture was grown until reaching an OD<sub>550</sub> 2.0. Bacterial cells were  
342 removed by centrifugation (9000 rpm, 30', 4°C, Sorvall RC6, SLA-3000 rotor). EspP and EspP  
343 *S263A* was collected from the cell-free supernatant by ammonium sulfate precipitation (60%,  
344 o/n, 4°C), followed by centrifugation (9000 rpm, 30', 4°C, Sorvall RC6, SLA-3000 rotor). The  
345 pellet was resuspended in PBS, syringe filtered (0.2 µm), then diluted with 15% glycerol to allow  
346 for freezing. Each batch of recombinant EspP and EspP *S263A* was separated on SDS-PAGE  
347 and stained with Coomassie Blue to check purity. Protein concentrations were determined by  
348 Bradford assay (Bio-Rad, Hercules, CA). Serine protease activity was determined by pepsin A-  
349 cleavage assay (Brockmeyer et al., 2007).

350

351 **EspP treatment and colonoid regeneration.** Colonoids were plated in Matrigel in 24 well  
352 plates and separated into experimental conditions (control, EspP treatment, EspP plus inhibitors

353 or agonists). Since the mechanics of passaging colonoids includes fragmenting their 3D structure  
354 and therefore causing injury, we attempted to minimize this by not triturating the colonoids, but  
355 instead, harvesting them without fragmentation and replating into new Matrigel. Colonoids were  
356 pre-treated with inhibitors or agonists at least 8h prior to overnight EspP treatment. After  
357 overnight treatment, colonoids were harvested in Cultrex Organoid Harvesting Solution, washed  
358 twice in Advanced DMEM/F12, and pelleted at 300 xg for 10' at 4°C, and replated in Matrigel  
359 for 24h regeneration. After replating, colonoids were kept in the presence of any inhibitors or  
360 agonists using during the experiment. After the 24h regeneration period, colonoids were imaged  
361 or processed for further studies. All experimental reagents used are detailed in Supplementary  
362 Table 2.

363

364 **Brightfield imaging.** Colonoids plated in Matrigel in 24 well plates were imaged during the  
365 course of experiments on a Zeiss Axio Observer A1 inverted microscope (Zeiss, Oberkochen,  
366 Germany) with images captured on CellSense imaging software (Olympus, Tokyo, Japan).  
367 Images were viewed and processed using OlyVia (Olympus).

368

369 **Immunofluorescence staining and confocal imaging.** Fixed tissues were frozen in OCT and  
370 sectioned (10 µm thick). Colonoids were harvested from Matrigel using Cultrex Organoid  
371 Harvesting Solution. They were pelleted (300 xg, 10', 4°C), and fixed for 40 min in 4%  
372 paraformaldehyde (Electron Microscopy Sciences, Hatfield, PA). Both fixed tissue and  
373 colonoids were permeabilized and blocked simultaneously for 1h using a 10% Fetal Bovine  
374 Serum (Atlanta Biologicals, Flowery Branch, GA), 0.1% saponin (MilliporeSigma) solution  
375 prepared in PBS. After three PBS washes, 100 µl of primary antibody against WNT2B



376 (HPA060696, MilliporeSigma) prepared at 1:100 dilution in PBS was added to the cells and  
377 incubated overnight at 4°C. Afterwards, cells were washed 3 times with PBS, and 100 µl of  
378 AlexaFluor secondary antibodies, AlexaFluor-647 phalloidin, and Hoechst 33342 (1 mg/ml, all  
379 ThermoFisher), diluted 1:100 in PBS, were added for 1h at room temperature. After three PBS  
380 washes, 50 µl of FluorSave Reagent (Calbiochem) was added to the colonoids and they were  
381 mounted between a glass slide and a number 1 coverslip. Confocal imaging was carried out in  
382 the Imaging Core of the Hopkins NIH/NIDDK Basic and Translational Research Digestive  
383 Disease Core Center using a LSM510 META laser scanning confocal microscope running ZEN  
384 2012 (black edition) imaging software (Zeiss).

385

386 **Protein extraction and proteomic analysis.** Colonoids were harvested in Cultrex Organoid  
387 Harvesting Solution and centrifuged at 300 xg for 10' at 4°C. The cells were washed with ice  
388 cold PBS 5 times to remove any serum proteins. Cells were lysed in 250 µl of lysis buffer (60  
389 mM HEPES pH 7.4, 150 mM KCl, 5 mM Na<sub>3</sub>EDTA, 5 mM EGTA, 1 mM Na<sub>3</sub>VO<sub>4</sub>, 50 mM  
390 NaF, 1 mM PMSF, 2% SDS (all MilliporeSigma)) supplemented with 1:100 of protease inhibitor  
391 cocktail (P8340, MilliporeSigma). Cells incubated with lysis buffer were sonicated on ice 3  
392 times for 10 sec using 30% energy input. The lysed cells were centrifuged for 10 min at 5000  
393 rpm at 4°C (MC2 Centrifuge, Sarstedt Desaga) to remove any unbroken cells. Protein  
394 concentration was determined by Bradford assay (Bio-Rad). Lysate was stored at -80°C.  
395 Proteomic analysis was carried out by the Mass Spectrometry and Proteomics Facility, Johns  
396 Hopkins University School of Medicine. Raw data was sent to and analyzed by Creative  
397 Proteomics (Shirley, NY). Figure S1A and B were generated by Creative Proteomics.

398

399 **RNA isolation and gene expression analysis**

400 Colonoids were harvested from Matrigel using Cultrex Organoid Harvesting Solution. Cells were  
401 centrifuged at 5000 rpm for 5 min at 4°C. Supernatant was removed and pellet was stored at -  
402 80C until RNA extraction. RNA isolation was carried out using PureLink RNA Mini Kit  
403 (ThermoFisher) according to the manufacturer's protocol. RNA concentration was determined  
404 using a DU 800 spectrophotometer (Beckman Coulter, Brea, CA). 500 ng to 2 ug of RNA was  
405 retro-transcribed into cDNA using SuperScript VILO Master Mix (ThermoFisher). DNA Real-  
406 time qPCR were run using PowerUp SYBR green Master Mix and QuantStudio 12K Flex Real-  
407 Time PCR instrument (all Applied Biosystems, Foster City, CA). Each sample was analyzed in  
408 triplicate. The primer oligonucleotide sequences are listed in Supplementary Table 3 (Xiaowei  
409 Wang, Athanasia Spandidos, Huajun Wang and Brian Seed: PrimerBank: a PCR primer database  
410 for quantitative gene expression analysis, 2012 update) AND (Bunaciu RP et al. 2008). The  
411 relative fold changes in mRNA levels between EspP-injured and control colonoids were  
412 determined using the  $2^{-\Delta\Delta CT}$  method with normalization to *18S* ribosomal RNA.

413

414 **Statistics.** Data are represented as means  $\pm$  SEM. Statistical significances were calculated using  
415 Student's *t*-test. Significance was represented as at least  $p < 0.05$ . All experiments were  
416 performed on a minimum of 3 different colonoid lines derived from separate normal human  
417 subjects, with a total of 7 colonoid lines used throughout these studies (Supplementary Table 1).  
418 N refers to number of independent replicates performed. All analyses were performed on  
419 GraphPad Prism 7.03 (GraphPad Software, La Jolla, CA).

420

421

## 422 **FIGURE LEGENDS**

### 423 **Figure 1. EspP requires serine protease function to cause cytotoxicity of human colonoids**

424 Representative images of colonoids after overnight treatment: control (left), EspP-treated  
425 (middle), and EspP 263A-treated (right). EspP requires serine protease activity to have a  
426 cytotoxic effect on the colonoids; scale bar = 200  $\mu\text{m}$ . N=3

427

### 428 **Figure 2. Colonoids can model crypt regeneration after EspP washout**

429 (A and B) Representative images of colonoids after washout and replating: (A) 24h post-washout  
430 and (B) 48h post-washout; scale bar = 200  $\mu\text{m}$ . N>3

431

### 432 **Figure 3. EspP-treated colonoids upregulate WNT2B and DHH during regeneration**

433 Gene expression of regenerating colonoids was analyzed by qRT-PCR. Relative gene expression  
434 is shown as a ratio of EspP-treated compared to control colonoids, and normalized to 18S. \*  $p <$   
435 0.05; \*\*  $p <$  0.01. N $\geq$ 11

436

### 437 **Figure 4. WNT2B compensates for inhibition of epithelial wnts in regenerating colonoids**

438 (A - C) Control (left) and EspP-treated (right) colonoids after washout, at 24h regeneration. (A)

439 Representative images of colonoids at 24h regeneration.

440 (B) Representative images of colonoids in the continued presence of IWP2 at 24h regeneration.

441 (C) Representative image of colonoids in the continued presence of IWP2 and recombinant

442 human WNT2B (rhWNT2B) at 24h regeneration; scale bar = 200  $\mu\text{m}$ . N $\geq$ 4

443

### 444 **Figure 5. TSK inhibits colonoid regeneration post EspP-treatment**

445 Representative images of control (left) and EspP-treated (right) colonoids after washout, at 24h  
446 regeneration. Control and EspP-treated colonoids were in the continued presence of recombinant  
447 human Tsukushi (rhTSK) (bottom panel); scale bar = 200  $\mu\text{m}$ . N=3

448

### 449 **Figure 6. Hedgehog agonists upregulate WNT2B3 and DHH during regeneration**

450 Control and EspP-treated colonoids were treated with Smoothed agonist (SAG) or  
451 recombinant human Desert Hedgehog (DHH). Gene expression of regenerating colonoids was  
452 analyzed by qRT-PCR. Relative gene expression is shown as a ratio of treated (EspP and/or SAG  
453 or DHH) compared to control colonoids, and normalized to 18S. n>3; \*  $p <$  0.05; \*\*  $p <$  0.01;  
454 \*\*\*  $p <$  0.001. N $\geq$ 3

455

### 456 **Figure S1. Proteomics analysis of differentially expressed proteins after EspP or EspP 457 263A treatment compared to control**

458 (A) The Venn diagram depicts the number of differentially expressed proteins in the EspP  
459 S263A-treated (blue circle) and the EspP-treated (green circle) colonoids compared to control.

460 Note the minimal overlap between the two treatments.

461 (B) The distribution of subcellular localization of differentially expressed proteins in the EspP-  
462 treated compared to control colonoids.

463

### 464 **Figure S2. WNT2B marks a specific cell in the colonic crypt**

465 (A and B) WNT2B is concentrated in a specific cell in (A) human colonic tissue and (B) human  
466 colonoids. WNT2B, green; nuclei, blue.

467 (C) EspP-treated colonoids regenerating 24h post-EspP washout. WNT2B staining is more  
468 diffuse with more WNT2B+ cells, seen in the zoomed inset (C'); scale bar = 10  $\mu$ m; WNT2B,  
469 green; nuclei, blue.

470

471 **Figure S3. Knockdown of WNT2B results in non-viable colonoids**

472 shRNA against DRA (top panel) and WNT2B (bottom panel) was introduced into duodenal  
473 enteroids or colonoids, respectively via lentivirus transduction. Images were taken 17 days post-  
474 transduction, showing healthy duodenal enteroids but lackluster colonoids.

475

476 **Table 1. EspP-injured colonoids upregulated proteins in the Wnt and Hedgehog pathways**

477 Selected proteins from the proteomics analysis show that proteins in the Wnt and Hedgehog  
478 pathways are upregulated in the EspP-injured colonoids. The ratio is protein expression of EspP-  
479 injured over control colonoids.

480

481

482

483

484

485

486

487

488

489

490

491

492

493

494

495

496

497 **REFERENCES**

- 498 Adolphe, C. (2004). An in vivo comparative study of sonic, desert and Indian hedgehog reveals that  
499 hedgehog pathway activity regulates epidermal stem cell homeostasis. *Development* *131*, 5009-5019.  
500
- 501 Bajestan, S.N., Umehara, F., Shirahama, Y., Itoh, K., Sharghi-Namini, S., Jessen, K.R., Mirsky, R., and  
502 Osame, M. (2006). Desert hedgehog-patched 2 expression in peripheral nerves during Wallerian  
503 degeneration and regeneration. *Journal of Neurobiology* *66*, 243-255.  
504
- 505 Beumer, J., and Clevers, H. (2016). Regulation and plasticity of intestinal stem cells during homeostasis  
506 and regeneration. *Development* *143*, 3639-3649.  
507
- 508 Brockmeyer, J., Bielaszewska, M., Fruth, A., Bonn, M.L., Mellmann, A., Humpf, H.U., and Karch, H. (2007).  
509 Subtypes of the Plasmid-Encoded Serine Protease EspP in Shiga Toxin-Producing *Escherichia coli*:  
510 Distribution, Secretion, and Proteolytic Activity. *Applied and Environmental Microbiology* *73*, 6351-6359.  
511
- 512 Büller, N.V.J.A., Rosekrans, S.L., Metcalfe, C., Heijmans, J., van Dop, W.A., Fessler, E., Jansen, M., Ahn, C.,  
513 Vermeulen, J.L.M., Westendorp, B.F., *et al.* (2015). Stromal Indian Hedgehog Signaling Is Required for  
514 Intestinal Adenoma Formation in Mice. *Gastroenterology* *148*, 170-180.e176.  
515
- 516 Bunaciu, R.P., Tang, T., and Mao, C.D. (2008). Differential expression of Wnt13 isoforms during leukemic  
517 cell differentiation. *Oncology Reports*, 195-201.  
518
- 519 Chen, J.K., Taipale, J., Cooper, M.K., and Beachy, P.A. (2002). Inhibition of Hedgehog signaling by direct  
520 binding of cyclopamine to Smoothened. *Genes & Development* *16*, 2743-2748.  
521
- 522 Clevers, H. (2006). Wnt/beta-catenin signaling in development and disease. *Cell* *127*, 469-480.  
523
- 524 Dautin, N. (2010). Serine Protease Autotransporters of Enterobacteriaceae (SPATEs): Biogenesis and  
525 Function. *Toxins* *2*, 1179-1206.  
526
- 527 Day, T.F., and Yang, Y. (2008). Wnt and hedgehog signaling pathways in bone development. *J Bone Joint*  
528 *Surg Am* *90 Suppl 1*, 19-24.  
529
- 530 Farin, H.F., Jordens, I., Mosa, M.H., Basak, O., Korving, J., Tauriello, D.V.F., de Punder, K., Angers, S.,  
531 Peters, P.J., Maurice, M.M., *et al.* (2016). Visualization of a short-range Wnt gradient in the intestinal  
532 stem-cell niche. *Nature* *530*, 340-343.  
533
- 534 Farin, H.F., Van Es, J.H., and Clevers, H. (2012). Redundant Sources of Wnt Regulate Intestinal Stem Cells  
535 and Promote Formation of Paneth Cells. *Gastroenterology* *143*, 1518-1529.e1517.  
536
- 537 Finco, I., Lerario, A.M., and Hammer, G.D. (2018). Sonic Hedgehog and WNT Signaling Promote Adrenal  
538 Gland Regeneration in Male Mice. *Endocrinology* *159*, 579-596.  
539
- 540 Franco, C., Soares, R., Pires, E., Koci, K., Almeida, A.M., Santos, R., and Coelho, A.V. (2013).  
541 Understanding regeneration through proteomics. *Proteomics* *13*, 686-709.  
542

543 Gregorieff, A., Pinto, D., Begthel, H., Destree, O., Kielman, M., and Clevers, H. (2005). Expression pattern  
544 of Wnt signaling components in the adult intestine. *Gastroenterology* 129, 626-638.  
545  
546 Greicius, G., Kabiri, Z., Sigmundsson, K., Liang, C., Bunte, R., Singh, M.K., and Virshup, D.M. (2018).  
547 PDGFRalpha(+) pericryptal stromal cells are the critical source of Wnts and RSPO3 for murine intestinal  
548 stem cells in vivo. *Proc Natl Acad Sci U S A* 115, E3173-E3181.  
549  
550 Henderson, I.R., Hicks, S., Navarro-Garcia, F., Elias, W.P., Philips, A.D., and Nataro, J.P. (1999).  
551 Involvement of the Enterohemorrhagic *Escherichia coli* Plasmid-Encoded Toxin in Causing Human  
552 Intestinal Damage. *Infection and Immunity* 67, 5338-5344.  
553  
554 Hua, G., Thin, T.H., Feldman, R., Haimovitz-Friedman, A., Clevers, H., Fuks, Z., and Kolesnick, R. (2012).  
555 Crypt Base Columnar Stem Cells in Small Intestines of Mice Are Radioresistant. *Gastroenterology* 143,  
556 1266-1276.  
557  
558 Hua, G., Wang, C., Pan, Y., Zeng, Z., Lee, S.G., Martin, M.L., Haimovitz-Friedman, A., Fuks, Z., Paty, P.B.,  
559 and Kolesnick, R. (2017). Distinct Levels of Radioresistance in Lgr5+Colonic Epithelial Stem Cells versus  
560 Lgr5+Small Intestinal Stem Cells. *Cancer Research* 77, 2124-2133.  
561  
562 In, J., Foulke-Abel, J., Zachos, N.C., Hansen, A.M., Kaper, J.B., Bernstein, H.D., Halushka, M., Blutt, S.,  
563 Estes, M.K., Donowitz, M., *et al.* (2016). Enterohemorrhagic *Escherichia coli* reduce mucus and  
564 intermicrovillar bridges in human stem cell-derived colonoids. *Cellular and Molecular Gastroenterology*  
565 *and Hepatology* 2, 48-62.e43.  
566  
567 In, J., Lukyanenko, V., Foulke-Abel, J., Hubbard, A.L., Delannoy, M., Hansen, A.-M., Kaper, J.B., Boisen, N.,  
568 Nataro, J.P., Zhu, C., *et al.* (2013). Serine Protease EspP from Enterohemorrhagic *Escherichia coli* Is  
569 Sufficient to Induce Shiga Toxin Macropinocytosis in Intestinal Epithelium. *PLoS ONE* 8, e69196.  
570 Jiang, H., Li, F., He, C., Wang, X., Li, Q., and Gao, H. (2014). Expression of Gli1 and Wnt2B correlates with  
571 progression and clinical outcome of pancreatic cancer. *Int J Clin Exp Pathol* 7, 4531-4538.  
572  
573 Jiang, H., Tian, A., and Jiang, J. (2016). Intestinal stem cell response to injury: lessons from *Drosophila*.  
574 *Cellular and Molecular Life Sciences* 73, 3337-3349.  
575  
576 Jung, P., Sato, T., Merlos-Suárez, A., Barriga, F.M., Iglesias, M., Rossell, D., Auer, H., Gallardo, M., Blasco,  
577 M.A., Sancho, E., *et al.* (2011). Isolation and in vitro expansion of human colonic stem cells. *Nature*  
578 *Medicine* 17, 1225-1227.  
579  
580 Katoh, M. (2001). Differential regulation of WNT2 and WNT2B expression in human cancer. *International*  
581 *Journal of Molecular Medicine* 8, 657-660.  
582  
583 Khan, M.A., Ma, C., Knodler, L.A., Valdez, Y., Rosenberger, C.M., Deng, W., Finlay, B.B., and Vallance, B.A.  
584 (2006). Toll-like receptor 4 contributes to colitis development but not to host defense during *Citrobacter*  
585 *rodentium* infection in mice. *Infect Immun* 74, 2522-2536.  
586  
587 Khan, S., Mian, H.S., Sandercock, L.E., Chirgadze, N.Y., and Pai, E.F. (2011). Crystal Structure of the  
588 Passenger Domain of the *Escherichia coli* Autotransporter EspP. *Journal of Molecular Biology* 413, 985-  
589 1000.  
590

591 Koch, S. (2017). Extrinsic control of Wnt signaling in the intestine. *Differentiation* 97, 1-8.  
592 Konstantinou, D., Bertaux-Skeirik, N., and Zavros, Y. (2016). Hedgehog signaling in the stomach. *Current*  
593 *Opinion in Pharmacology* 31, 76-82.  
594  
595 Kucerova, R., Dora, N., Mort, R.L., Wallace, K., Leiper, L.J., Lowes, C., Neves, C., Walczysko, P., Bruce, F.,  
596 Fowler, P.A., *et al.* (2012). Interaction between hedgehog signalling and PAX6 dosage mediates  
597 maintenance and regeneration of the corneal epithelium. *Molecular Vision* 18, 139-150.  
598  
599 Kuruvilla, Jes G., Kim, C.-K., Ghaleb, Amr M., Bialkowska, Agnieszka B., Kuo, Calvin J., and Yang,  
600 Vincent W. (2016). Krüppel-like Factor 4 Modulates Development of BMI1+ Intestinal Stem Cell-Derived  
601 Lineage Following  $\gamma$ -Radiation-Induced Gut Injury in Mice. *Stem Cell Reports* 6, 815-824.  
602  
603 Langiewicz, M., Schlegel, A., Saponara, E., Linecker, M., Borger, P., Graf, R., Humar, B., and Clavien, P.A.  
604 (2016). Hedgehog pathway mediates early acceleration of liver regeneration induced by a novel two-  
605 staged hepatectomy in mice. *Journal of Hepatology*.  
606  
607 Le, H., Kleinerman, R., Lerman, O.Z., Brown, D., Galiano, R., Gurtner, G.C., Warren, S.M., Levine, J.P., and  
608 Saadeh, P.B. (2008). Hedgehog signaling is essential for normal wound healing. *Wound Repair and*  
609 *Regeneration* 16, 768-773.  
610  
611 Mazumdar, T., DeVecchio, J., Shi, T., Jones, J., Agyeman, A., and Houghton, J.A. (2011). Hedgehog  
612 signaling drives cellular survival in human colon carcinoma cells. *Cancer Res* 71, 1092-1102.  
613  
614 Mellies, J.L., Navarro-Garcia, F., Okeke, I., Frederickson, J., Nataro, J.P., and Kaper, J.B. (2001). espC  
615 pathogenicity island of enteropathogenic *Escherichia coli* encodes an enterotoxin. *Infect Immun* 69, 315-  
616 324.  
617  
618 Metcalfe, C., Kljavin, Noelyn M., Ybarra, R., and de Sauvage, Frederic J. (2014). Lgr5+ Stem Cells Are  
619 Indispensable for Radiation-Induced Intestinal Regeneration. *Cell Stem Cell* 14, 149-159.  
620  
621 O'Hara, W.A., Azar, W.J., Behringer, R.R., Renfree, M.B., and Pask, A.J. (2011). *Desert hedgehog* is a  
622 mammal-specific gene expressing during testicular and ovarian development in a marsupial. *BMC*  
623 *Developmental Biology* 11.  
624  
625 O'Connell, A.E., Zhou, F., Shah, M.S., Murphy, Q., Rickner, H., Kelsen, J., Boyle, J., Doyle, J.J., Gangwani,  
626 B., Thiagarajah, J.R., *et al.* (2018). Neonatal-Onset Chronic Diarrhea Caused by Homozygous Nonsense  
627 WNT2B Mutations. *The American Journal of Human Genetics*.  
628  
629 Ohta, K., Ito, A., Kuriyama, S., Lupo, G., Kosaka, M., Ohnuma, S.-i., Nakagawa, S., and Tanaka, H. (2011).  
630 Tsukushi functions as a Wnt signaling inhibitor by competing with Wnt2b for binding to transmembrane  
631 protein Frizzled4. *Proc Natl Acad Sci U S A* 108, 14962-14967.  
632  
633 Parmantier, E., Lynn, B.L., Durward, Turmaine, M., Namini, S.S., Chakrabarti, L., McMahon, A.P., Jessen,  
634 K.R., and Mirsky, R. (1999). Schwann Cell-Derived Desert Hedgehog Controls the Development of  
635 Peripheral Nerve Sheaths. *Neuron* 23, 713-724.  
636  
637 Petrova, R., and Joyner, A.L. (2014). Roles for Hedgehog signaling in adult organ homeostasis and repair.  
638 *Development* 141, 3445-3457.

639  
640 Regan, J.L., Schumacher, D., Staudte, S., Steffen, A., Haybaeck, J., Keilholz, U., Schweiger, C., Golob-  
641 Schwarzl, N., Mumberg, D., Henderson, D., *et al.* (2017). Non-Canonical Hedgehog Signaling Is a Positive  
642 Regulator of the WNT Pathway and Is Required for the Survival of Colon Cancer Stem Cells. *Cell Reports*  
643 *21*, 2813-2828.  
644  
645 Ritsma, L., Ellenbroek, S.I.J., Zomer, A., Snippert, H.J., de Sauvage, F.J., Simons, B.D., Clevers, H., and van  
646 Rheenen, J. (2014). Intestinal crypt homeostasis revealed at single-stem-cell level by in vivo live imaging.  
647 *Nature* *507*, 362-365.  
648  
649 Rothacker, K.M., Ayers, K.L., Tang, D., Joshi, K., van den Bergen, J.A., Robevska, G., Samnakay, N.,  
650 Nagarajan, L., Francis, K., Sinclair, A.H., *et al.* (2018). A novel, homozygous mutation in desert hedgehog  
651 (DHH) in a 46, XY patient with dysgenetic testes presenting with primary amenorrhoea: a case report. *Int*  
652 *J Pediatr Endocrinol* *2018*, 2.  
653  
654 Sato, T., Stange, D.E., Ferrante, M., Vries, R.G., Van Es, J.H., Van den Brink, S., Van Houdt, W.J., Pronk, A.,  
655 Van Gorp, J., Siersema, P.D., *et al.* (2011). Long-term expansion of epithelial organoids from human  
656 colon, adenoma, adenocarcinoma, and Barrett's epithelium. *Gastroenterology* *141*, 1762-1772.  
657  
658 Shin, K., Lee, J., Guo, N., Kim, J., Lim, A., Qu, L., Mysorekar, I.U., and Beachy, P.A. (2011). Hedgehog/Wnt  
659 feedback supports regenerative proliferation of epithelial stem cells in bladder. *Nature* *472*, 110-114.  
660  
661 Shoshkes-Carmel, M., Wang, Y.J., Wangenstein, K.J., Toth, B., Kondo, A., Massassa, E.E., Itzkovitz, S., and  
662 Kaestner, K.H. (2018). Subepithelial telocytes are an important source of Wnts that supports intestinal  
663 crypts. *Nature* *557*, 242-246.  
664  
665 Song, L., Li, Z.-Y., Liu, W.-P., and Zhao, M.-R. (2015). Crosstalk between Wnt/ $\beta$ -catenin and Hedgehog/Gli  
666 signaling pathways in colon cancer and implications for therapy. *Cancer Biology & Therapy* *16*, 1-7.  
667  
668 Sriperumbudur, A., Breitzig, M., Lockey, R., and Kolliputi, N. (2016). Hedgehog: the key to maintaining  
669 adult lung repair and regeneration. *Journal of Cell Communication and Signaling*.  
670  
671 Suh, H.N., Kim, M.J., Jung, Y.-S., Lien, E.M., Jun, S., and Park, J.-I. (2017). Quiescence Exit of Tert + Stem  
672 Cells by Wnt/ $\beta$ -Catenin Is Indispensable for Intestinal Regeneration. *Cell Reports* *21*, 2571-2584.  
673  
674 Szabady, R.L., Peterson, J.H., Skillman, K.M., and Bernstein, H.D. (2004). From The Cover: An unusual  
675 signal peptide facilitates late steps in the biogenesis of a bacterial autotransporter. *Proceedings of the*  
676 *National Academy of Sciences* *102*, 221-226.  
677  
678 Tian, A., Shi, Q., Jiang, A., Li, S., Wang, B., and Jiang, J. (2015). Injury-stimulated Hedgehog signaling  
679 promotes regenerative proliferation of *Drosophila* intestinal stem cells. *The Journal of Cell Biology* *208*,  
680 807-819.  
681  
682 Trowbridge, J.J., Scott, M.P., and Bhatia, M. (2006). Hedgehog modulates cell cycle regulators in stem  
683 cells to control hematopoietic regeneration. *Proceedings of the National Academy of Sciences* *103*,  
684 14134-14139.



685 Valenta, T., Degirmenci, B., Moor, Andreas E., Herr, P., Zimmerli, D., Moor, Matthias B., Hausmann, G.,  
686 Cantù, C., Aguet, M., and Basler, K. (2016). Wnt Ligands Secreted by Subepithelial Mesenchymal Cells  
687 Are Essential for the Survival of Intestinal Stem Cells and Gut Homeostasis. *Cell Reports* *15*, 911-918.  
688  
689 Vallance, B.A., Deng, W., Jacobson, K., and Finlay, B.B. (2003). Host Susceptibility to the Attaching and  
690 Effacing Bacterial Pathogen *Citrobacter rodentium*. *Infection and Immunity* *71*, 3443-3453.  
691  
692 Van den Brink, G.R. (2007). Hedgehog Signaling in Development and Homeostasis of the Gastrointestinal  
693 Tract. *Physiological Reviews* *87*, 1343-1375.  
694  
695 van den Brink, G.R., Bleuming, S.A., Hardwick, J.C.H., Schepman, B.L., Offerhaus, G.J., Keller, J.J., Nielsen,  
696 C., Gaffield, W., van Deventer, S.J.H., Roberts, D.J., *et al.* (2004). Indian Hedgehog is an antagonist of  
697 Wnt signaling in colonic epithelial cell differentiation. *Nature Genetics* *36*, 277-282.  
698  
699 van Dop, W.A., Heijmans, J., Büller, N.V.J.A., Snoek, S.A., Rosekrans, S.L., Wassenberg, E.A., van den  
700 Bergh Weerman, M.A., Lanske, B., Clarke, A.R., Winton, D.J., *et al.* (2010). Loss of Indian Hedgehog  
701 Activates Multiple Aspects of a Wound Healing Response in the Mouse Intestine. *Gastroenterology* *139*,  
702 1665-1676.e1610.  
703  
704 Varjosalo, M., and Taipale, J. (2008). Hedgehog: functions and mechanisms. *Genes & Development* *22*,  
705 2454-2472.  
706  
707 Wang, Y., Lu, P., Zhao, D., and Sheng, J. (2016a). Targeting the hedgehog signaling pathway for cardiac  
708 repair and regeneration. *Herz*.  
709  
710 Wang, Z., Li, W., Li, C., Yang, Y., Li, W., Zhang, L., Sun, S., Li, J., and Cai, Y. (2016b). Small hepatocyte-like  
711 progenitor cells may be a Hedgehog signaling pathway-controlled subgroup of liver stem cells.  
712 *Experimental and Therapeutic Medicine*.  
713  
714 Weiss, A., and Brockmeyer, J. (2012). Prevalence, Biogenesis, and Functionality of the Serine Protease  
715 Autotransporter EspP. *Toxins* *5*, 25-48.  
716  
717 Xicohtencatl-Cortes, J., Monteiro-Neto, V., Ledesma, M.A., Jordan, D.M., Francetic, O., Kaper, J.B.,  
718 Puente, J.L., and Girón, J.A. (2007). Intestinal adherence associated with type IV pili of  
719 enterohemorrhagic *Escherichia coli* O157:H7. *Journal of Clinical Investigation* *117*, 3519-3529.  
720 Yao, H.H.-C., Whoriskey, W., and Capel, B. (2002). Desert Hedgehog/Patched 1 signaling specifies fetal  
721 Leydig cell fate in testis organogenesis. *Genes and Development* *16*, 1433-1440.  
722  
723 Zhang, L., Song, R., Gu, D., Zhang, X., Yu, B., Liu, B., and Xie, J. (2017). The role of GLI1 for 5-Fu resistance  
724 in colorectal cancer. *Cell Biosci* *7*, 17.  
725 Zhou, W.-J., Geng, Z.H., Spence, J.R., and Geng, J.-G. (2013). Induction of intestinal stem cells by R-  
726 spondin 1 and Slit2 augments chemoradioprotection. *Nature* *501*, 107-111.  
727  
728 Zou, W.Y., Blutt, S.E., Zeng, X.-L., Chen, M.-S., Lo, Y.-H., Castillo-Azofeifa, D., Klein, O.D., Shroyer, N.F.,  
729 Donowitz, M., and Estes, M.K. (2018). Epithelial WNT Ligands Are Essential Drivers of Intestinal Stem Cell  
730 Activation. *Cell Reports* *22*, 1003-1015.

731

732 **Figure 1**

733

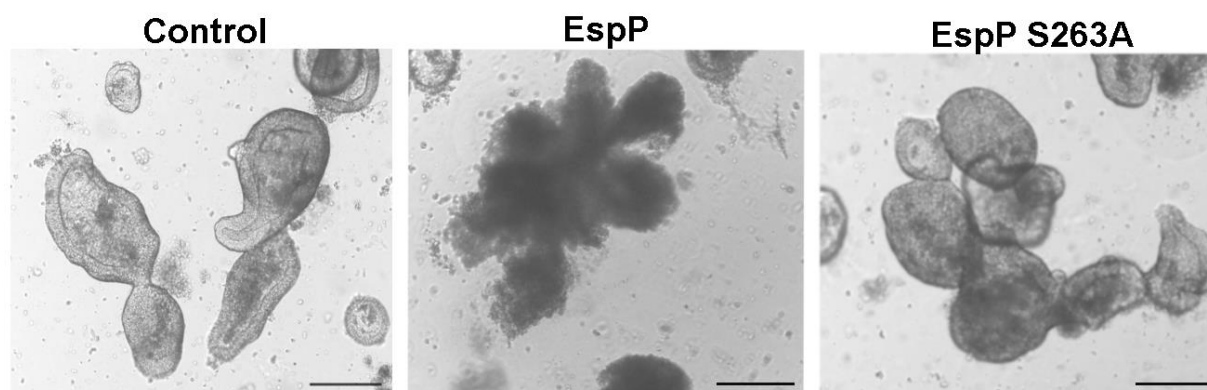

734

735

736

737

738

739

740

741

742

743

744

745

746

747

748

749

750

751

752

753

754

755

756

757

758 **Figure 2**

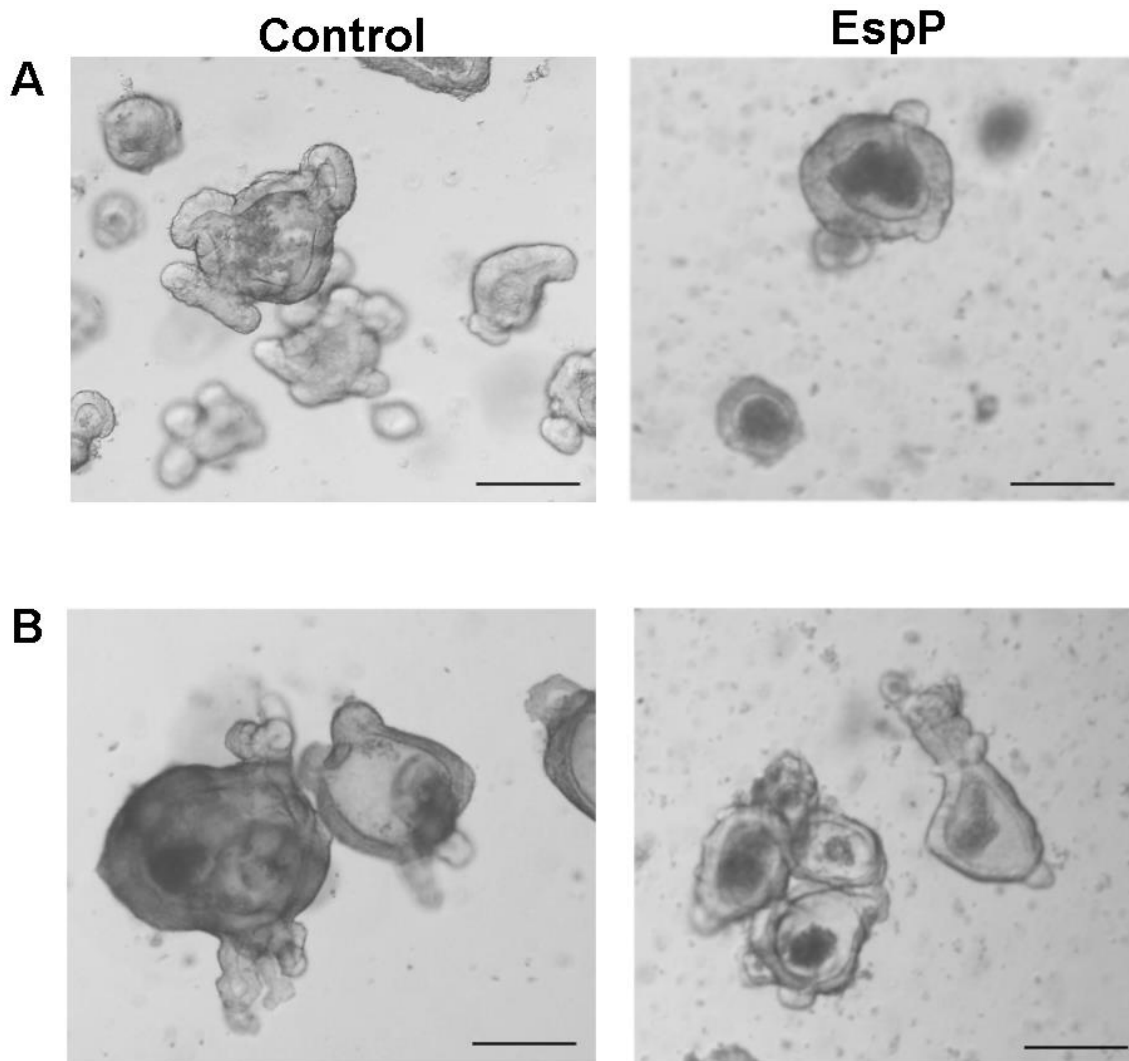

759  
760  
761  
762  
763  
764  
765  
766  
767  
768  
769  
770

771 **Figure 3**

772

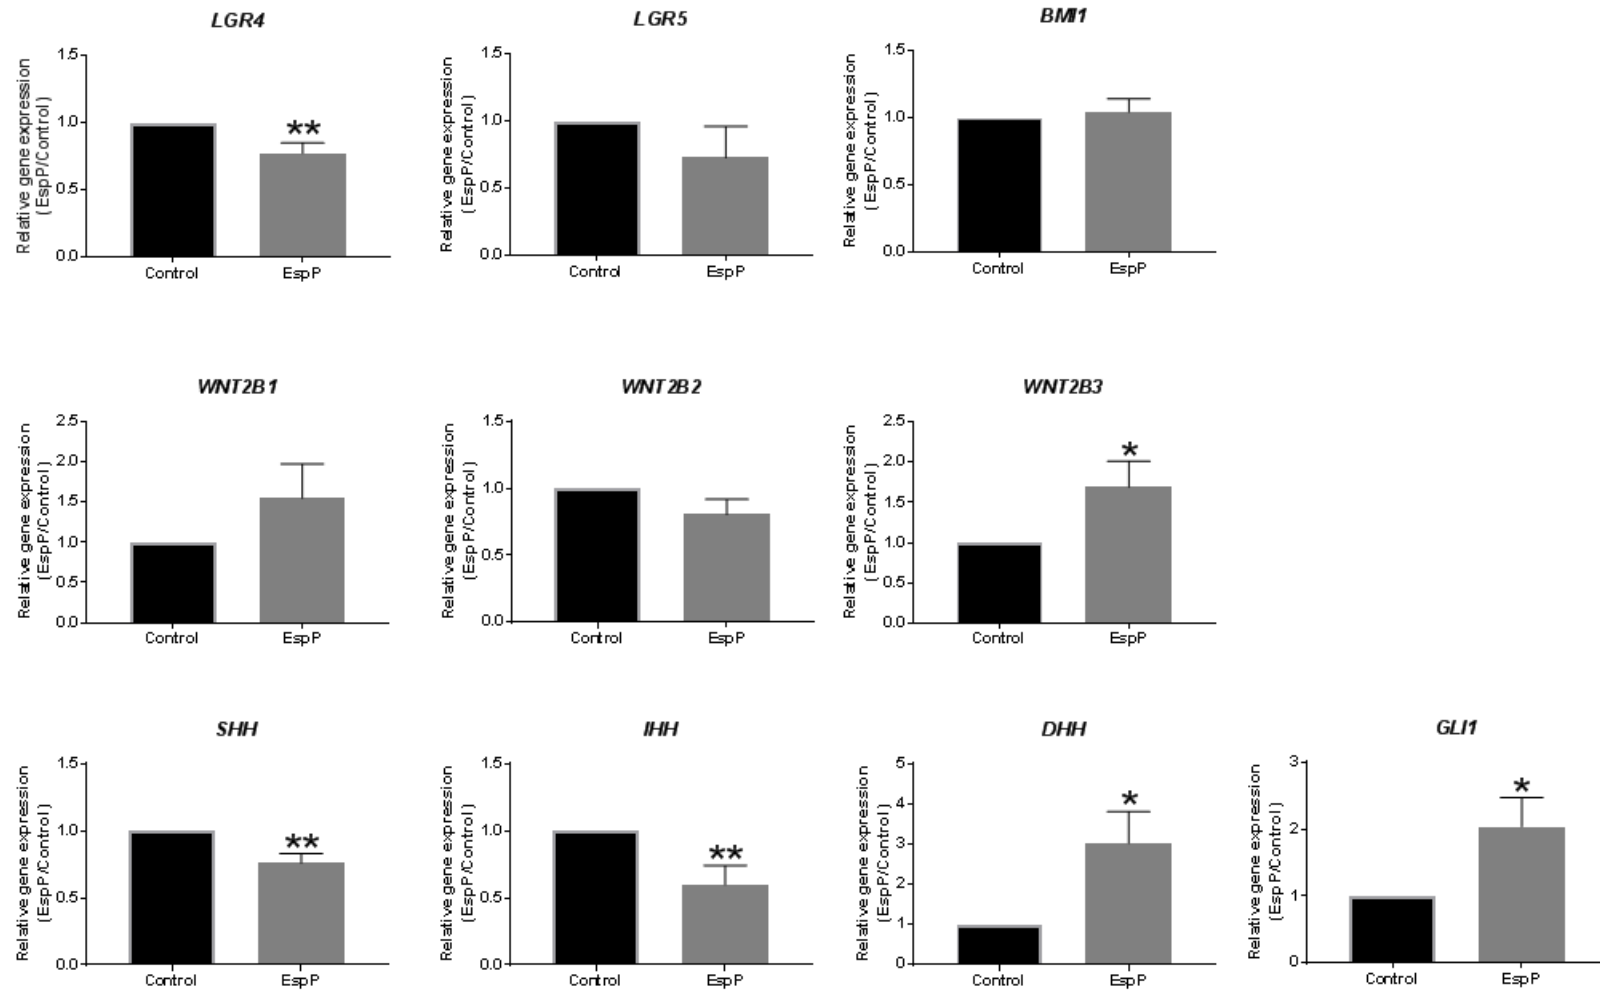

773

774

775 **Figure 4**

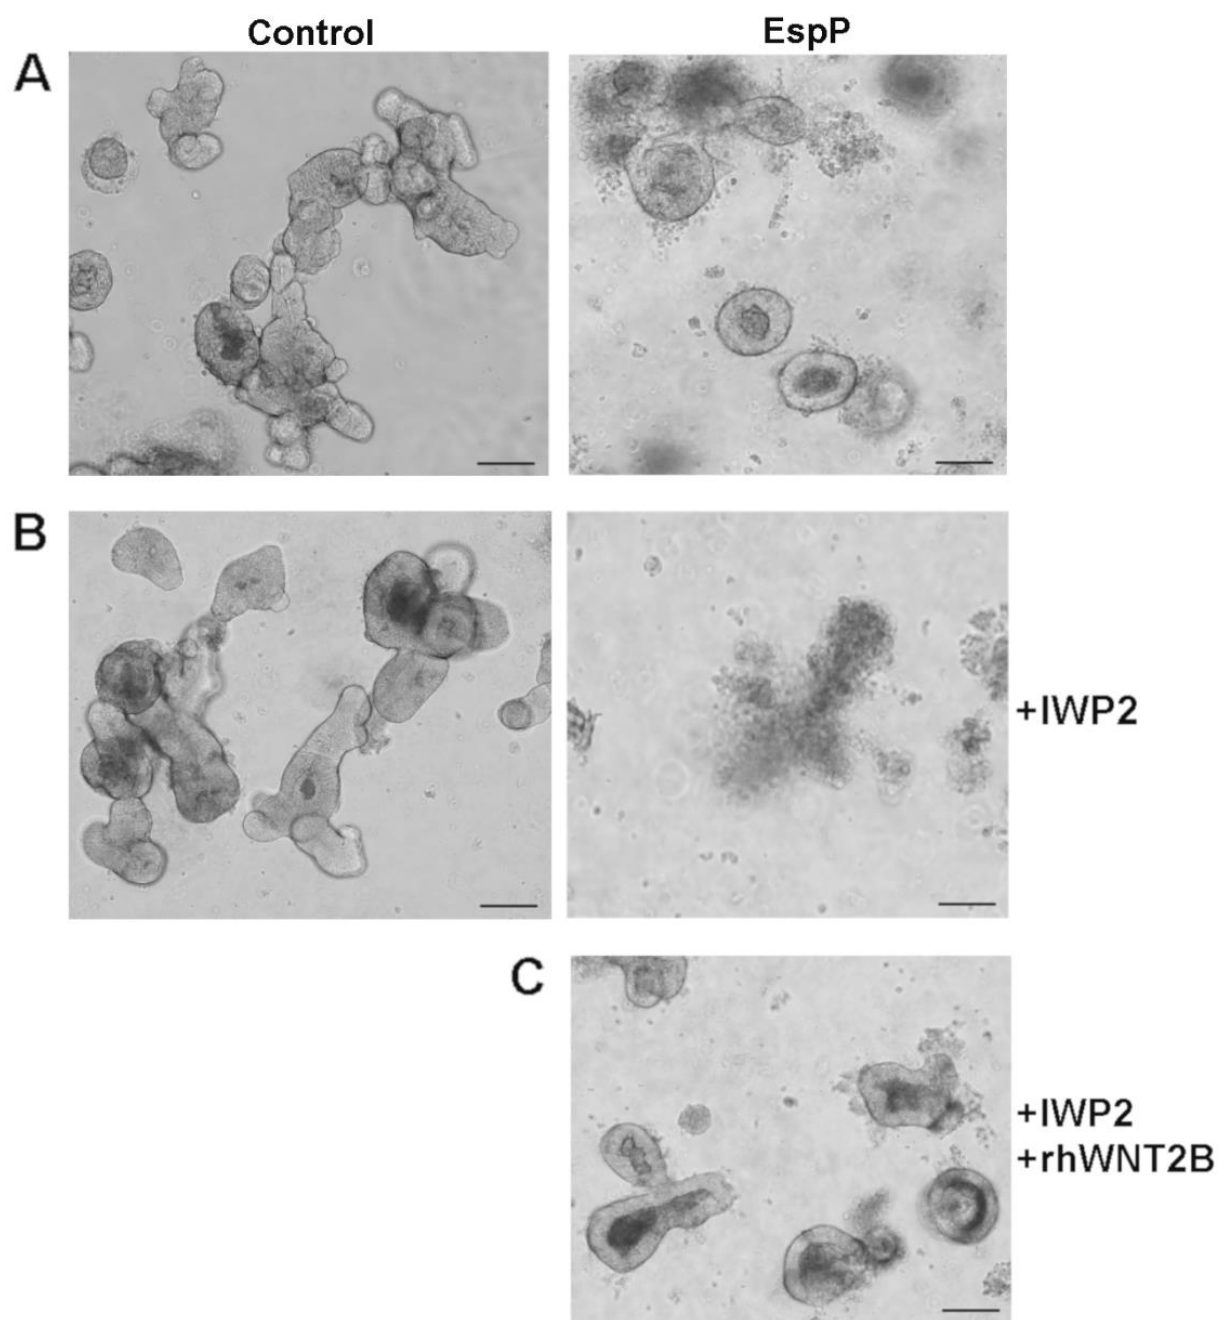

776

777

778

779

780

781

782

783 **Figure 5**

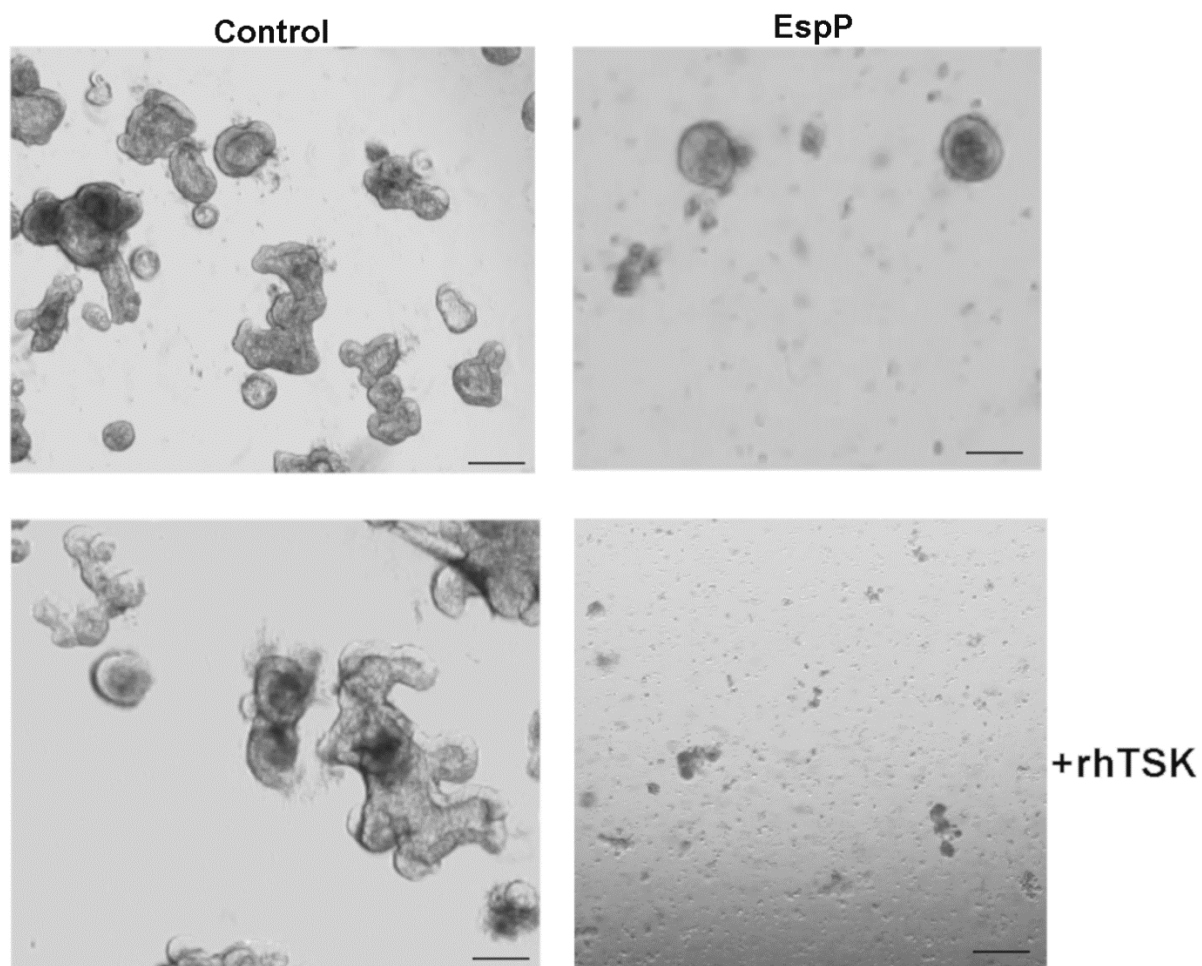

784  
785  
786  
787  
788  
789  
790  
791  
792  
793  
794  
795  
796  
797

798 **Figure 6**

799

800

801

802

803

804

805

806

807

808

809

810

811

812

813

814

815

816

817

818

819

820

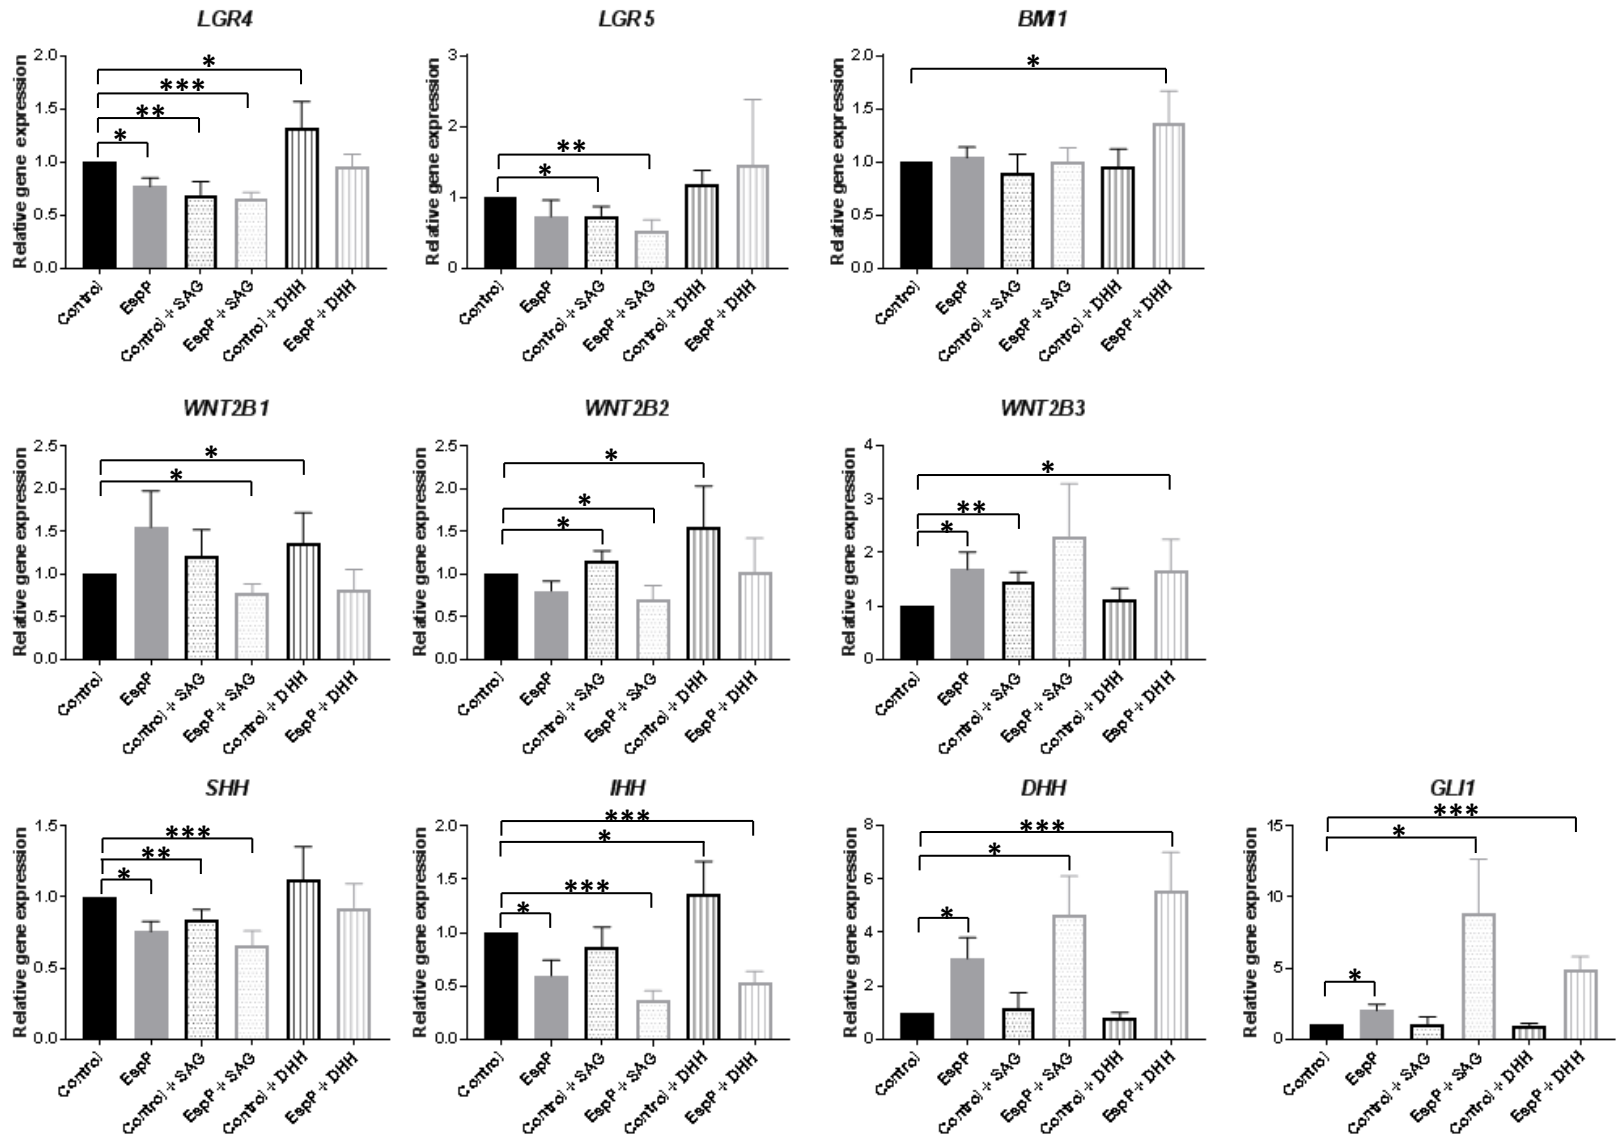

821 **Table 1**

| <b>Accession</b> | <b>Description ( Homo sapiens)</b>                                         | <b>Coverage</b> | <b>Ratio (EspP/control)</b> |
|------------------|----------------------------------------------------------------------------|-----------------|-----------------------------|
| <b>630044901</b> | <b>Protein Wnt2b isoform 3</b>                                             | <b>4.35</b>     | <b>3.101</b>                |
| <b>27883842</b>  | <b>Polycomb complex protein BMI-1</b>                                      | <b>2.15</b>     | <b>2.057</b>                |
| <b>4502805</b>   | <b>chromogranin-A isoform 1 preproprotein</b>                              | <b>39.61</b>    | <b>2.009</b>                |
| <b>31542745</b>  | <b>protein wntless homolog isoform 1 precursor</b>                         | <b>6.10</b>     | <b>1.997</b>                |
| <b>24431935</b>  | <b>reticulon-4 isoform A</b>                                               | <b>12.08</b>    | <b>1.995</b>                |
| <b>4506055</b>   | <b>cAMP-dependent protein kinase catalytic subunit alpha isoform 1</b>     | <b>36.47</b>    | <b>1.807</b>                |
| <b>20544145</b>  | <b>casein kinase I isoform delta isoform 2</b>                             | <b>16.63</b>    | <b>1.734</b>                |
| <b>395394053</b> | <b>disheveled-associated activator of morphogenesis 1 isoform 2</b>        | <b>7.49</b>     | <b>1.585</b>                |
| <b>225903437</b> | <b>glycogen synthase kinase-3 beta isoform 2</b>                           | <b>20.95</b>    | <b>1.678</b>                |
| <b>395394053</b> | <b>disheveled-associated activator of morphogenesis 1 isoform 2</b>        | <b>7.49</b>     | <b>1.585</b>                |
| <b>188528675</b> | <b>slit homolog 1 protein precursor</b>                                    | <b>4.69</b>     | <b>1.520</b>                |
| <b>34485714</b>  | <b>ras-related protein Rab-23</b>                                          | <b>12.24</b>    | <b>1.477</b>                |
| <b>33636738</b>  | <b>cAMP-dependent protein kinase catalytic subunit beta isoform 1</b>      | <b>28.14</b>    | <b>1.464</b>                |
| <b>25121993</b>  | <b>RNA-binding protein Musashi homolog 2 isoform b</b>                     | <b>27.49</b>    | <b>1.391</b>                |
| <b>148727288</b> | <b>low-density lipoprotein receptor-related protein 6 precursor</b>        | <b>4.15</b>     | <b>1.350</b>                |
| <b>14916475</b>  | <b>protein Wnt-3a precursor</b>                                            | <b>27.56</b>    | <b>1.269</b>                |
| <b>578808446</b> | <b>PREDICTED: slit homolog 2 protein isoform X5</b>                        | <b>13.65</b>    | <b>1.259</b>                |
| <b>4885523</b>   | <b>noggin precursor</b>                                                    | <b>22.84</b>    | <b>1.247</b>                |
| <b>578808417</b> | <b>PREDICTED: prominin-1 isoform X5</b>                                    | <b>3.68</b>     | <b>1.194</b>                |
| <b>339276103</b> | <b>R-spondin-1 isoform 3 precursor</b>                                     | <b>31.50</b>    | <b>1.167</b>                |
| <b>11545873</b>  | <b>SPARC-related modular calcium-binding protein 1 isoform 2 precursor</b> | <b>7.14</b>     | <b>1.141</b>                |

822



823 **Figure S1**

**A.**

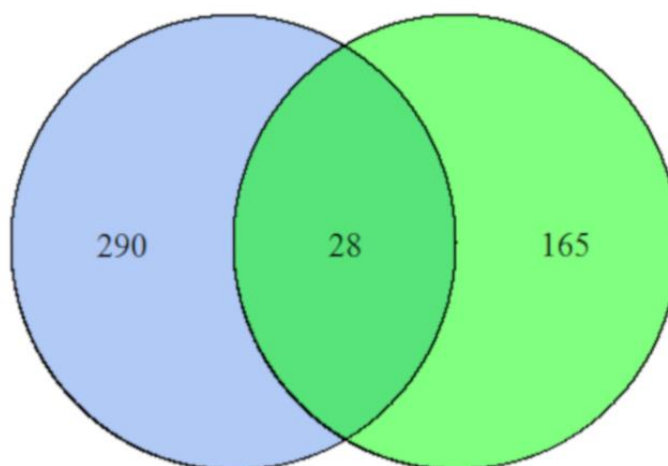

**B.**

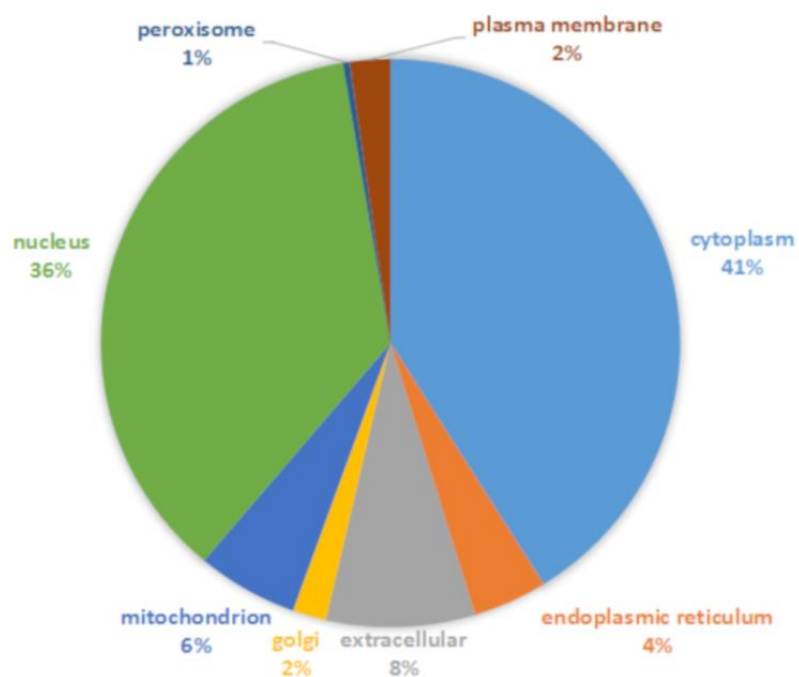

824

825

826

827

828

829 **Figure S2**

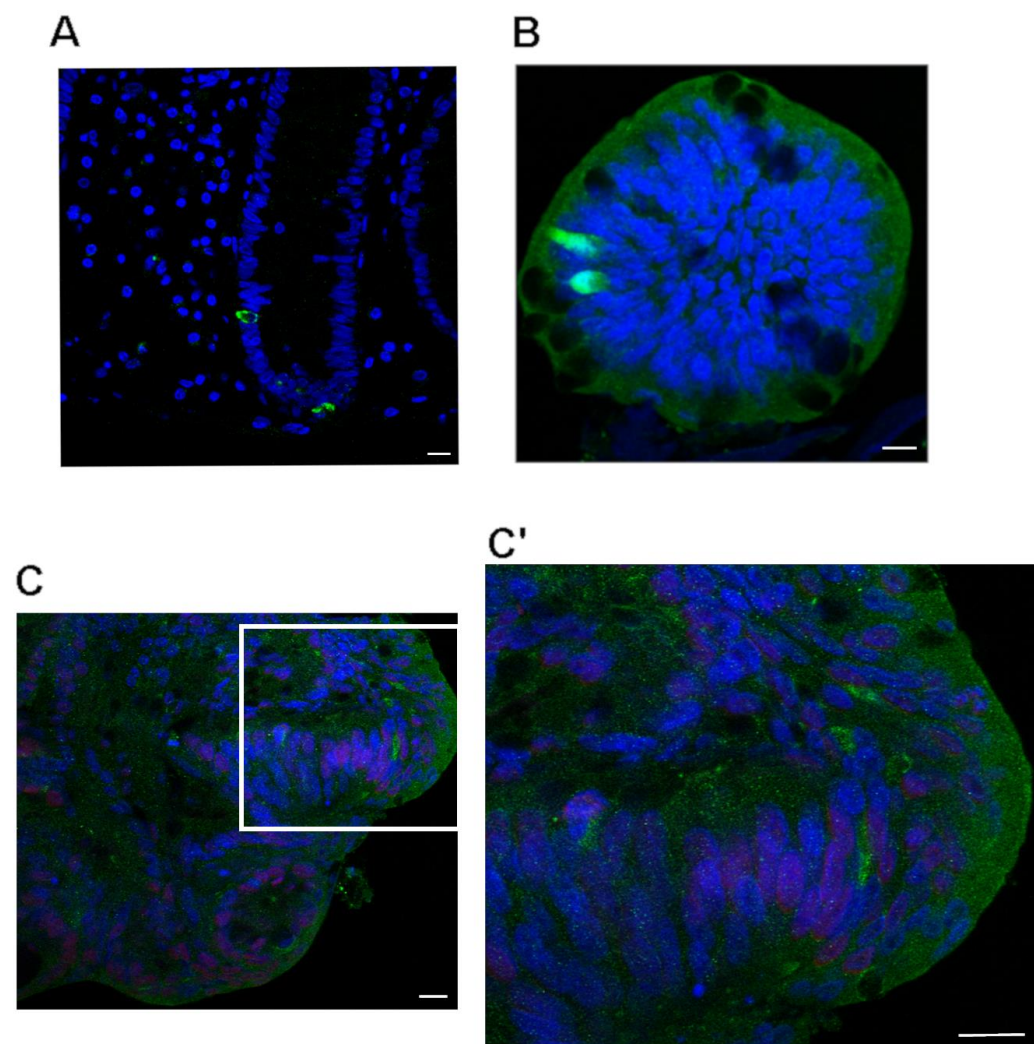

830  
831  
832  
833  
834  
835  
836  
837  
838  
839  
840  
841

842 **Figure S3**

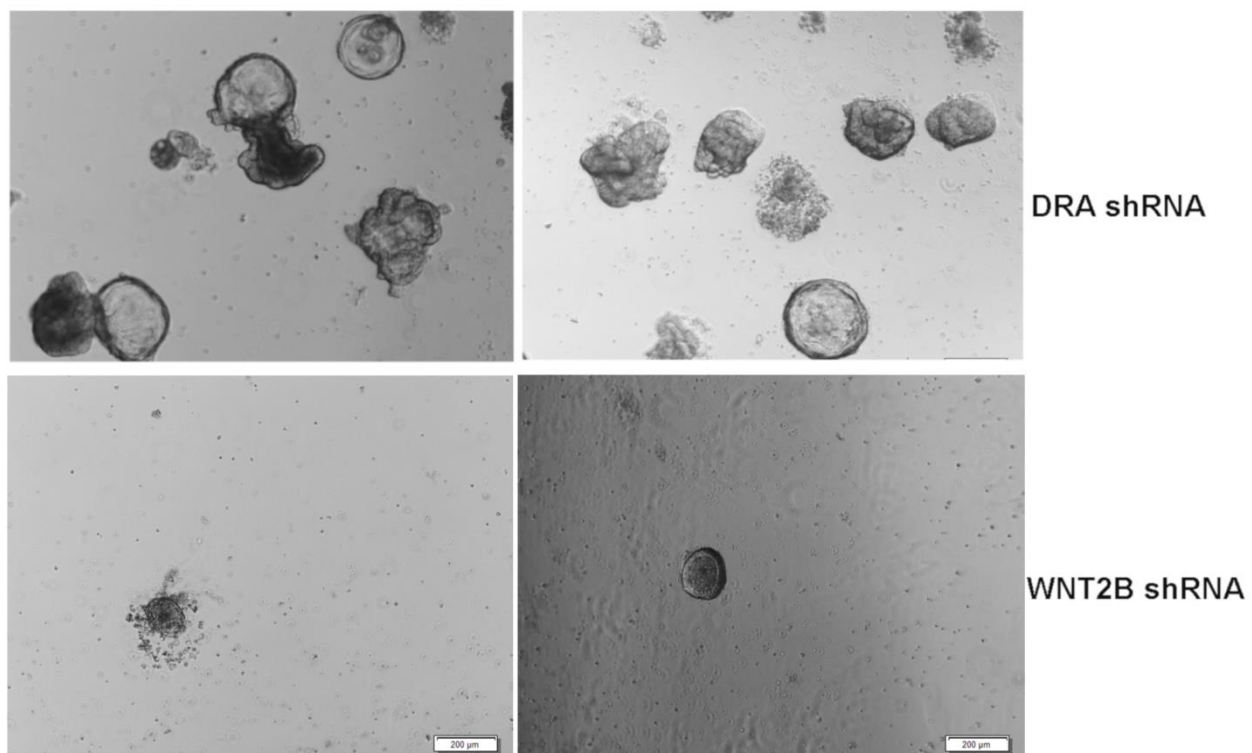

843  
844  
845  
846  
847  
848  
849  
850  
851  
852  
853  
854  
855  
856  
857  
858  
859  
860

861 **Supplemental Table 1**

| <b>Number</b> | <b>Patient pathology</b>         | <b>Colonic segment</b> | <b>Age</b> | <b>Gender</b> |
|---------------|----------------------------------|------------------------|------------|---------------|
| <b>1</b>      | <b>Normal, routine screening</b> | <b>sigmoid</b>         | <b>53</b>  | <b>M</b>      |
| <b>2</b>      | <b>Normal, routine screening</b> | <b>distal</b>          | <b>66</b>  | <b>M</b>      |
| <b>3</b>      | <b>Normal, routine screening</b> | <b>transverse</b>      | <b>50</b>  | <b>M</b>      |
| <b>4</b>      | <b>Normal, routine screening</b> | <b>proximal</b>        | <b>56</b>  | <b>F</b>      |
| <b>5</b>      | <b>Normal, routine screening</b> | <b>proximal</b>        | <b>58</b>  | <b>M</b>      |
| <b>6</b>      | <b>Normal, routine screening</b> | <b>proximal</b>        | <b>50</b>  | <b>M</b>      |
| <b>7</b>      | <b>Normal, routine screening</b> | <b>proximal</b>        | <b>67</b>  | <b>F</b>      |

862

863

864

865

866

867

868

869

870

871

872

873

874

875

876

877

878

879

880

881

882

883 **Supplemental Table 2**

| <b>Reagent</b>                                   | <b>Supplier</b>        | <b>Catalog number</b> | <b>Concentration</b>          |
|--------------------------------------------------|------------------------|-----------------------|-------------------------------|
|                                                  |                        |                       |                               |
| <b>IWP-2</b>                                     | <b>MilliporeSigma</b>  | <b>10536</b>          | <b>2.5 <math>\mu</math>M</b>  |
| <b>Recombinant human Desert Hedgehog (rhDHH)</b> | <b>R&amp;D systems</b> | <b>4777-DH</b>        | <b>2 <math>\mu</math>g/ml</b> |
| <b>Recombinant human Tsukushi (rhTSK)</b>        | <b>R&amp;D systems</b> | <b>3940-TS</b>        | <b>2 <math>\mu</math>g/ml</b> |
| <b>Recombinant human WNT2B (rhWNT2B)</b>         | <b>MyBioSource</b>     | <b>MBS1352751</b>     | <b>1 <math>\mu</math>g/ml</b> |
| <b>Smoothened Agonist (SAG)</b>                  | <b>MilliporeSigma</b>  | <b>566661</b>         | <b>500 nM</b>                 |

884

885

886

887

888

889

890

891

892

893

894

895

896

897

898

899

900

901

902

903 **Supplemental Table 3**

| <b>Gene Name</b> | <b>Forward Primer</b>   | <b>Reverse Primer</b>   |
|------------------|-------------------------|-------------------------|
| <i>BMI1</i>      | CCATTGAATTCTTTGACCAGAA  | CTGCTGGGCATCGTAAGTATC   |
| <i>DHH</i>       | CGAGCGTTGTAAGGAGCGG     | CCCTCAGTCACTCGTAGGC     |
| <i>GLI1</i>      | AACGCTATACAGATCCTAGCTCG | GTGCCGTTTGGTCACATGG     |
| <i>GLI2</i>      | CCCCTACCGATTGACATGCG    | GAAAGCCGGATCAAGGAGATG   |
| <i>IHH</i>       | TGCATTGCTCCGTCAAGTC     | CCACTCTCCAGGCGTACCT     |
| <i>LGR4</i>      | GATAACAGCCTCCAGGACCA    | TTCAAGAGTGCTTGTGACATTTG |
| <i>LGR5</i>      | ACCAGACTATGCCTTTGGAAAC  | TTCCCAGGGAGTGGATTCTAT   |
| <i>SHH</i>       | GCTTCGACTGGGTGTACTACG   | GCCACCGAGTTCTCTGCT      |
| <i>WNT2B-1</i>   | GATCCTTGAGGACGGCAGTA    | GCATGATGTCTGGGTAACGC    |
| <i>WNT2B-2</i>   | CGTAGACACGTCCTGGTGGTA   | GCATGATGTCTGGGTAACGC    |
| <i>WNT2B-3</i>   | CTAAAAGTACATTGGGGCAC    | GCATGATGTCTGGGTAACGC    |
| <i>18S</i>       | GCAATTATTCCCATGAACG     | GGGACTTAATCAACGCAAGC    |

904
